# Supplementary material
Source: ML conference proceedings conference paper supplement (https://openaccess.thecvf.com/content/ICCV2025/html/Wan_Intra-view_and_Inter-view_ICCV_2025_paper.html)
Supplement: Supplementary file 1 [file Wan_Intra-view_and_Inter-view_ICCV_2025_supplemental.pdf]

# Intra-view and Inter-view Correlation Guided Multi-view Novel Class Discovery

## Supplementary Material

### 1. Datasets

We use eight multi-view datasets in our experiments, each described in detail below.

1. **BRCA**<sup>1</sup>: This dataset is designed for classifying PAM50 subtypes in breast invasive carcinoma, incorporating three distinct omics data types: messenger RNA (mRNA), Copy Number Variation (CNV), and Reverse-Phase Protein Array (RPPA). It consists of 511 samples, divided into four categories: Luminal A, Luminal B, Triple-Negative Breast Cancer, and HER2-positive.
2. **KIPAN**<sup>2</sup>: This dataset is designed for kidney cancer subtype classification. It integrates three types of omics data: DNA methylation, miRNA expression, and mRNA expression. It contains 707 samples, divided into three kidney cancer subtypes: KICH (Kidney Chromophobe), KIRC (Kidney Renal Clear Cell Carcinoma), and KIRP (Kidney Renal Papillary Cell Carcinoma).
3. **uci-digit**<sup>3</sup>: This dataset is designed for handwritten digit recognition. It contains images of digits from 0 to 9, with 2,000 samples divided into 10 categories.
4. **Cora**<sup>4</sup>: A widely used benchmark for machine learning and network analysis, this dataset comprises 2,708 computer science publications. It provides two main views: a citation network formed by paper citations and content-related words for each paper. The publications are divided into seven research area categories, such as Case-Based, Genetic Algorithms, and Neural Networks.
5. **Wiki**<sup>5</sup>: This dataset is used for text classification, containing feature representations of 2,866 Wikipedia articles divided into 10 categories.
6. **CCV**<sup>6</sup>: This dataset is used for video classification tasks and contains consumer videos from YouTube across categories such as sports, music, and movies. It includes 6,773 video clips.
7. **STL10**<sup>7</sup>: This dataset is used for image recognition tasks and includes 10 object classes.
8. **YTB10**<sup>8</sup>: This dataset is used for face recognition tasks, containing 38,654 face images extracted from YouTube videos.

<sup>1</sup><https://www.cancer.gov/tcga>

<sup>2</sup>[https://www.linkedomics.org/data\\_download/TCGA-KIPAN/](https://www.linkedomics.org/data_download/TCGA-KIPAN/)

<sup>3</sup><https://archive.ics.uci.edu/dataset/72/multiple+features>

<sup>4</sup><https://lings.org/datasets/>

<sup>5</sup><https://archive.ics.uci.edu/dataset/72/multiple+features>

<sup>6</sup><http://www.ee.columbia.edu/ln/dvmm/CCV/>

<sup>7</sup><https://cs.stanford.edu/~acoates/stl10/>

<sup>8</sup><https://www.cs.tau.ac.il/~wolf/ytfaces/>

Table 1. The influence of pseudo-labels on our model.

| Datasets  | Random | Sinkhorn-knopp | <i>k</i> -means | Ours         |
|-----------|--------|----------------|-----------------|--------------|
| BRCA      | 64.24  | 63.03          | 60.61           | <b>98.79</b> |
| KIPAN     | 54.60  | 54.13          | 90.64           | <b>92.51</b> |
| uci-digit | 29.50  | 27.60          | 93.40           | <b>95.30</b> |
| Cora      | 28.33  | 28.47          | 29.47           | <b>76.36</b> |
| Wiki      | 22.74  | 23.46          | 31.21           | <b>65.42</b> |
| CCV       | 12.86  | 12.68          | 30.45           | <b>34.20</b> |
| STL10     | 21.65  | 21.86          | 98.98           | <b>99.02</b> |
| YTB10     | 33.86  | 33.86          | 79.08           | <b>94.55</b> |

### 2. The influence of pseudo-labels

In our paper, we mentioned that the use of pseudo-label guidance during the clustering process can lead to unstable model performance. To validate this hypothesis, we replaced our algorithm with pseudo-label induced clustering. Specifically, we added a constraint term for pseudo-labels similar to the known class label constraint term in Eq. (3). There are three methods for generating pseudo-labels: random labeling, using the Sinkhorn-Knopp algorithm, and labeling with the *k*-means algorithm. The results are shown in the Table 1, which demonstrates that different methods of pseudo-label guided clustering significantly impact model performance. Therefore, it is essential to use algorithms that do not rely on pseudo-labels during the process of discovering new classes.
